# Supplementary material for: Anticancer activity of halofuginone in a preclinical model of osteosarcoma: inhibition of tumor growth and lung metastases
Source: PubMed Central journal article supplement (PMC4546476; doi:10.18632/oncotarget.3891), 2015-05-07
Supplement: oncotarget-06-14413-s001.pdf [file oncotarget-06-14413-s001.pdf]

## SUPPLEMENTARY FIGURE

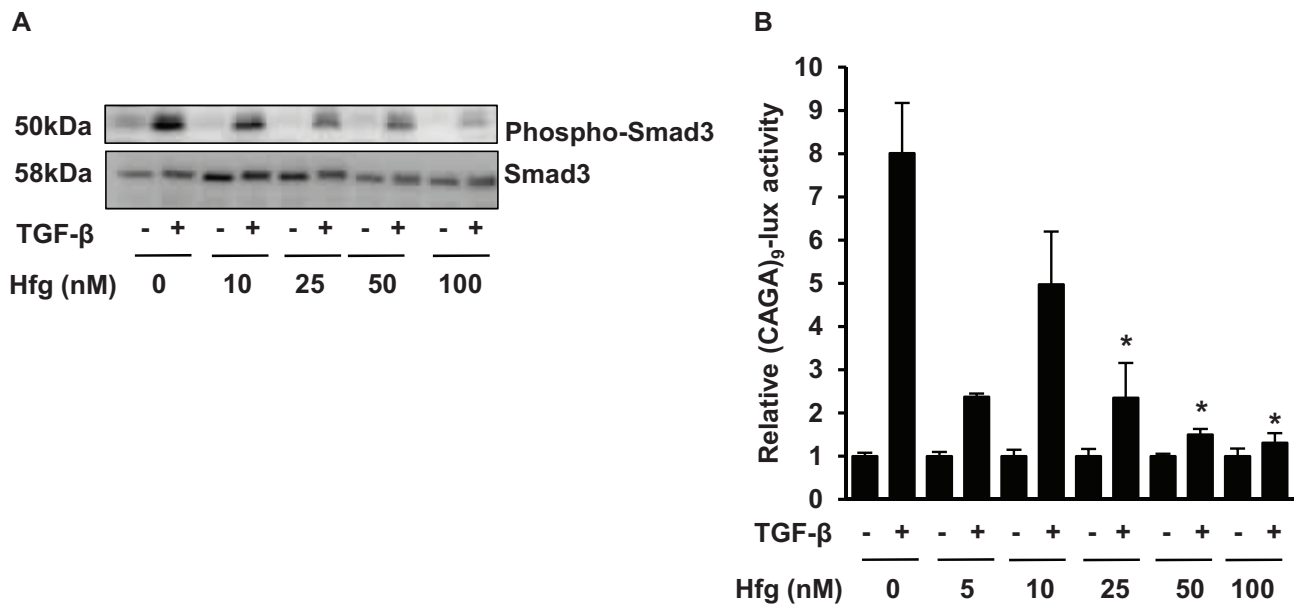

**Supplementary Figure S1: Halofuginone blocks the TGF- $\beta$ /Smad3 cascade in U2OS cells.** **A.** U2OS cells were treated for 4 hours with halofuginone as indicated and then for 30 min in the presence or absence of TGF- $\beta$  (5 ng/ml). Phospho-Smad3 levels were detected by Western Blot analysis of U2OS whole cell lysates (upper panel). Anti-Smad3 antibody was used as internal control (lower panel). **B.** U2OS cells were transfected with the Smad3/4-specific construct (CAGA)<sub>9</sub>-luc. 24 h after transfection, cells were treated for 4 hours with halofuginone as indicated and then for 6 hours in presence or absence of TGF- $\beta$  (5 ng/ml). Bars indicate mean  $\pm$  S.D. of at least two independent experiments carried out in triplicate (\* $p$  < 0.05).
